1

## 2 Speciation without gene-flow in hybridizing deer

3 Camille Kessler<sup>1</sup>, Eric Wootton<sup>2</sup>, Aaron B.A. Shafer<sup>1</sup>

4 <sup>1</sup>Environmental and Life Sciences Graduate Program, Trent University, 7K9J 7B8 Peterborough,  
5 Ontario, Canada

6 <sup>2</sup>Biochemistry & Molecular Biology, Trent University, K9J 7B8 Peterborough, Ontario, Canada

7

8 Corresponding authors:

9 Camille Kessler: [camillekessler@trentu.ca](mailto:camillekessler@trentu.ca)

10 Aaron Shafer: [aaronshafer@trentu.ca](mailto:aaronshafer@trentu.ca)

11

12

## Abstract

Hybridisation in nature is part of the continuum of speciation. Under the ecological speciation model, divergent selection acts on ecological differences between populations, gradually creating barriers to gene flow and ultimately leading to reproductive isolation. Here, we used white-tailed (*Odocoileus virginianus*) and mule deer (*O. hemionus*) to investigate patterns of speciation in hybridising sister species. We quantified genome-wide introgression and performed genome scans to look for signatures of four different selection scenarios. Despite modern evidence of hybridization, we found no sign of introgression, no signature of divergence with gene flow, and localized patterns of allopatric and balancing selection in the genome. Of note, genes under balancing selection were related to immunity and MHC or sensory perception of smell, the latter of which is consistent with deer biology. The deficiency of patterns selection suggests that white-tailed and mule deer were spatially separated during the glaciation cycles of the Pleistocene where genome wide differentiation accrued via drift. Absence of historical introgression signs could suggest Dobzhansky-Muller incompatibilities and selection against hybrids, and that both species are now far along the speciation continuum. Our results suggests that WTD & MD do not conform to a speciation with gene flow scenario, but that they evolved via drift in allopatry during the Quaternary and that both species are currently advanced along the speciation continuum.

## Introduction

Hybridisation is a widespread phenomenon that occurs at variable rates (Mallet 2005; Ragavan et al. 2017; Iacolina et al. 2019; Taylor and Larson 2019; Adavoudi and Pilot 2021). The prevalence of hybridisation suggests speciation follows a continuum as opposed to the more discrete and allopatric view introduced by Mayr (1942) (Mallet 2005; Stankowski and Ravinet 2021). However, both ideas are not incompatible as the speciation continuum ultimately leads to reproductive isolation with hybridisation being a natural outcome (Stankowski and Ravinet 2021). Under the ecological speciation model (sensu Darwin, 1859), hybrids are common and can even facilitate speciation (Nosil 2012). Ecological speciation works when ecological differences lead to divergent selection between populations; eventually, the underlying genetic mechanisms (i.e. causative loci) gradually create barriers to gene flow, ultimately leading to reproductive isolation (Rundle and Nosil 2005; Nosil 2012; Shafer and Wolf 2013).

The genetic mechanisms involved in ecological speciation can take the form of barrier loci which act as a restraint to gene flow in different ways: for example, such loci can be under divergent selection, involved in mate choice or contribute to assortative mating, or reduce hybrids fitness (Abbott et al. 2013; Ravinet et al. 2017). Divergent selection should produce genomic islands in this context, also referred to as genomic islands of speciation, that are regions of the genome where the differentiation (e.g.  $F_{ST}$ ) is higher than the neutral genomic background (Ravinet et al. 2017; Campbell et al. 2018). Such loci and islands have been observed in several species, underpinning a wide array of speciation and divergence processes (Poelstra et al. 2014; Momigliano et al. 2017; Lavretsky et al. 2019; Marques et al. 2019). Scanning the genome for just  $F_{ST}$  peaks when speciation with gene flow is ongoing, however, is problematic as other mechanisms can create similar  $F_{ST}$  profiles such as genetic drift, global

adaptation, or simply reduced genetic diversity due to background selection (Cruickshank and Hahn 2014; Burri 2017; Ravinet et al. 2017; Booker et al. 2021). Joint genome scans including  $F_{ST}$ ,  $d_{xy}$  and  $\pi$  facilitate a better depiction of the processes of selection and ecological speciation (Cruickshank and Hahn 2014; Ravinet et al. 2017; Campbell et al. 2018; Shang et al. 2021). Of note, Shang et al. (2021) recently conceptualized the expected patterns  $F_{ST}$ ,  $d_{xy}$  and  $\pi$  under the main modes of selection; this approach allows for neutral patterns of evolution to be disentangled from selection based on contrasting patterns of the aforementioned summary statistics.

White-tailed deer (*Odocoileus virginianus*; WTD) and mule deer (*O. hemionus*; MD) are abundant in North America with similar morphology, activity patterns and life-history traits, but they differ in several ecological aspects (Douzery and Randi 1997; Gilbert et al. 2006; Pitra et al. 2004; Brunjes et al. 2006; Berry et al. 2019). WTD prioritise security and thermoregulation whereas MD favour food availability (Whittaker and Lindzey 2004); consequently, WTD prefer habitats at lower altitude and with denser visual cover than MD that favour open areas at higher elevation (Anthony and Smith 1977; Brunjes et al. 2006). White-tailed deer and MD also differ in their sociality and associated predator response. Mule deer live in large cohesive groups including both sexes, and, as a group, adopt an aggressive behaviour in presence of predators, whereas WTD live in smaller female-biased groups and flee in response to predators (Lingle 2001; Lingle 2003). Both species represent a high economic value in North America as hunting-related activities generate billions of dollars annually (Cambronne 2013), and both species are important cultural component of Indigenous communities (Adams and Hamilton 2011; Peres and Altman 2018).

Despite a species divergence date estimated at ~3.13 mya (Wright et al. 2021), WTD and MD hybridise in areas of sympatry with estimated hybridisation rates ranging from 1 to 19% depending on the region (Carr and Hughes 1993; Hornbeck and Mahoney 2000; Combe et al. 2021; Russell et al. 2021). Both species likely spent considerable time in allopatry (i.e. separate refugia) during glacial events (e.g Moscarella et al. 2003; Latch et al. 2009). It has also been shown that however restricted, gene flow appears bidirectional as there are signs of introgression at both mitochondrial and nuclear levels, such that some MD acquired WTD mitochondrial DNA around ~1.32 Mya (Carr et al. 1986; Cronin 1991; Derr 1991; Carr and Hughes 1993; Cathey et al. 1998; Bradley et al. 2003; Russell et al. 2019; Wright et al. 2021). This pattern also suggests ancestral hybridisation and gene flow has taken place. Given their clear phenotypic and behavioural differences, and their documented hybridisation, white-tailed and mule deer do not conform to the biological species concept (Mayr 1942). Here, we hypothesize that WTD and MD have evolved via ecological speciation, and more specifically a speciation with gene flow scenario. To test this hypothesis, we quantified genome-wide introgression and past admixture events and performed genome scans to look for signatures of four different selection regimes. We expected to find genetic signs of divergent selection, such as speciation islands, consistent with patterns of divergence with gene flow (DwGF). We also predicted higher rates of admixture and historical introgression in areas of sympatry.

## **Results**

We sequenced 28 individuals to an average coverage of approximately 4x. We called 10,397,088 SNPs, which represented 0.4% of the genome. In the PCA based on allele frequencies, PC1 accounted for 59% of the variation and separated both species (Fig.1B). PC2 explained an additional 8% of the variation and showed a spread of MD individuals that is consistent with

their longitudinal distribution (Pearson correlation = 0.8;  $p$ -value = 0.00057). Latitude was not important in shaping PC1 or PC2 variation ( $p > 0.05$ ). Admixture analysis showed a well-defined genetic clustering between species (Evanno's method: best  $K = 2$ ; Fig.1C). The WTD individual Ov\_MX2 was partially admixed in both analyses, with NGSAdmix assigning it 92.5% WTD and 7.44% MD ancestry (Fig.1C). This individuals' admixed pattern disappeared in the admixture analysis with higher  $K$  values ( $K = 3$  to 7, Fig.S1), though additional within species clusters are observed.

We performed an ABBA-BABA test based on genotype likelihoods between all combinations of our 28 individuals in a first analysis and between all four populations in a second, with the caribou as outgroup. We computed 9828 ABBA-BABA individual topologies in ANGSD; inter-species introgression estimates were all very close to 0, with a  $D$ -statistic ranging from 0.011 to -0.013 and  $Z$ -score from 6.92 to -8.85.  $D$ -statistic in intra-species comparisons range from 0.25 to 0.916 ( $Z$ -score from 114.54 to 13111.97) in ABBA and from -0.046 to -0.914 ( $Z$ -score from -25.42 to -1348.55) in BABA (Fig.2A). In the comparisons between the four populations, three ABBA-BABA topologies presented signatures of introgression on a total of 12. The single inter-species comparison presents a  $D$ -statistic of -0.07 ( $Z$ -score = -7.66) for an introgression between sympatric MD and WTD. The other two comparisons show a reciprocal introgression between MD in allopatry and sympatry of 0.9 and 0.89 ( $Z$ -score = 1342.83 & 1376.69; Fig.S2). The treemix analyses showed a topology with no migration that explained over 99% of the variation (Fig.2B).

We further analysed introgression through the measure of  $f_d$  across 50kb non-overlapping windows in two different introgression scenarios: 1) WTD\_allopatry, WTD\_sympatry, MD\_sympatry, Caribou and 2) MD\_allopatry, MD\_sympatry, WTD\_sympatry,

Caribou (Fig.S3). We found 1243 outlier windows with a  $f_d$  higher than the 97.5% percentile in the first scenario and 1248 in the second, each representing ~2.45% of the genome with 68 windows overlapping between comparisons (Fig.S3).

Measures of relative genomic divergence between WTD and MD were elevated ( $F_{ST} = 0.26$ ) but absolute divergence was relatively low ( $d_{xy} = 0.011$ ); genetic diversity ( $\pi$ ) was higher in WTD than in MD (WTD = 0.008, MD = 0.004, Mann-Whitney test:  $p < 2.2e-16$ ). We identified a total of 1183 windows presenting patterns consistent with one of the four selection scenarios (Fig.3, Fig.S4). Of those, 1016 suggest a pattern of balancing selection, they were distributed across 236 scaffolds and represent 1.99% of the genome. Those windows contained 121 genes, some of which showed an enrichment in ontologies associated with the sense of smell and chemical stimuli, including three categories presenting an enrichment above 15-fold (Fig.4A, Fig. S5). We also detected GOs related to the MHC and immunity, these include three categories with an enrichment above 24-fold (Fig. S5). We identified patterns of background selection in 165 windows across 58 scaffolds, representing 0.32% of the genome. These windows harboured 208 genes identified with a UniProt ID and for which we found enrichment in GOs related to epigenetic factors such as “Unmethylated CpG binding” (25-fold) or “Histone demethylation” (15-fold) (Fig.4B, Fig. S6). These windows were either isolated or clustered together into putative islands of divergence (Fig.S4). We found 2 windows under allopatric selection, each window containing one gene: ACAP2, a GTPase activating protein, and PCDHB4 potentially involved in cell-binding (UniProt 2022a; UniProt 2022b). When we applied a more liberal cut-offs for  $F_{ST}$ ,  $d_{xy}$ , and  $\pi$  we still observed no evidence for divergence with gene flow (Table S3).

## Discussion

We investigated the speciation history of the *Odocoileus* genera through introgression analyses and genome scans. Our results show the absence of historical hybridisation between WTD & MD suggesting speciation between those species took place without gene flow despite contemporary and historical evidence (Stubblefield et al. 1986; Cronin et al. 1988; Cronin 1991; Derr 1991; Hughes and Carr 1993; Cathey et al. 1998; Hornbeck and Mahoney 2000; Combe et al. 2021; Russell et al. 2021). The main pattern of selection from the genome scans is that of balancing selection, with notably patterns of divergence with gene flow absent. Moreover, the scarcity of allopatric selection (i.e., positive selection post divergence) suggests isolation and drift primarily underlies the species differentiation, with WTD and MD likely only recently coming into secondary contact. The genome-wide scans combined with the absence of introgression suggests that WTD & MD are far along the speciation continuum (i.e. Phase 3-4 in Feder 2012), despite contemporary hybridization.

### **Speciation with an absence of historical introgression**

Contemporary hybridisation in wild WTD & MD is documented at rates ranging from 1 to 19% depending on the region (Stubblefield et al. 1986; Cronin et al. 1988; Cronin 1991; Derr 1991; Hughes and Carr 1993; Cathey et al. 1998; Hornbeck and Mahoney 2000; Combe et al. 2021; Russell et al. 2021). Moreover, a proposed historical mtDNA introgression would suggest ancestral hybridisation occurred (Wright et al. 2022). We therefore expected to find signs of hybridisation or introgression in our samples (e.g. Combe et al. 2021). We found evidence for some contemporary hybridisation in one sample (Fig.1C), but no strong signals of historical interbreeding at the genome-wide level were detected. Our sampling surely is limited for the detection of recent hybridisation, but previous studies suggest gene flow is rather restricted (Cronin et al. 1988; Cronin 1991; Derr 1991; Hughes and Carr 1993; Russell et al. 2021). For



example, Russell et al. (2019) discovered a 1% hybridisation rate in Alberta by sampling 987 individuals in a range overlap of approximately 230,000 km<sup>2</sup>. While signatures of fd identified potentially introgressed windows in ~1% of the genome, this metric can be a sign of incomplete lineage sorting (ILS) rather than introgression, particularly with no signs of genome-wide introgression as evidenced in the D statistic. Moreover, the independent treemix analysis does not support historical gene flow, thus collectively, we consider the fd signal to be reflective of ILS which would be expected given the high genome-wide diversity and a relatively recent species-split (Cutter 2013).

The absence of signatures of ancestral hybridisation suggest that WTD & MD evolved in allopatry and have recently come in secondary contact. The dynamic history of the North American continent, notably the glacial cycles of the Quaternary, shaped the evolution and distribution of many species (Avice et al. 1998; Hewitt 2000; Shafer et al. 2010). The use of different refugia for prolonged periods of time during the glaciation events has increased the differentiation between populations in several species, including deer (Latch et al. 2014; Dussex et al. 2020; Kinoshita et al. 2020; Colella et al. 2021; Ito et al. 2021). Previous studies show that MD persisted in several refugia during the glacial cycles of the Pleistocene, increasing the intraspecific divergence (Latch et al. 2009; Latch et al. 2014; Wright et al. 2022). Environmental shifts following the LGM also seem to have impacted the divergence between subspecies of WTD & MD in Florida and Mexico for example (Ellsworth et al. 1994; Alminas et al. 2021). More recently, a form of allopatry was mediated through overharvest and habitat destruction of WTD where populations greatly decreased to extirpation in some regions (Deyoung et al. 2003; McDonald et al. 2004; Budd et al. 2018; Chafin et al. 2021). Here, the core of the current sympatric zone was greatly affected, notably Colorado, Montana, Idaho,

Nebraska and Wyoming where WTD was almost extirpated before restocking efforts took place starting in the mid 40's (McDonald et al. 2004). Historical introgression could further be hindered by selection against hybrids, either through sexual selection, intrinsic or ecological incompatibilities (Rundle and Nosil 2005; Rundle and Nosil 2005; Nosil 2012). Given the genome-wide level of differentiation, we hypothesize that Dobzhansky-Muller incompatibles (DMIs) are in play, noting that they often occur early and rapidly (Schumer et al. 2015)

Little is known about hybrid fitness in the *Odocoileus* genera. Assessment of a single F1 male suggested it was fertile and it showed no overt genetic defects (Derr et al. 1991), but conclusions can not be drawn from a single observation. Sexual selection can be a powerful driver of selection against hybrids (Servedio 2004). In WTD, while females might favour males with larger antlers (Morina et al. 2018), sexual selection is overall poorly understood in *Odocoileus* and most studies focus on male breeding success rather than sexual selection by females (DeYoung et al. 2006; DeYoung et al. 2009; Jones et al. 2011; Newbolt et al. 2017). Morphologically, however, WTD & MD are very similar and the identification of their hybrids is often unreliable with the metatarsal gland and their escape gaits being the only characters consistently distinguishing hybrids (Lingle 1992; Wishart 1980). Thus, we propose a testable hypothesis that ecological incompatibilities combined with DMI maintain the species boundary. More research is also needed on WTD/MD hybrids to quantify their fitness and genomic regions underlying any selected hybrid phenotypes.

### **Mixed signatures of selection underly speciation in North American deer**

Given ongoing hybridisation between WTD & MD and a history of recurrent glacial cycles, we expected to find deer genomes showing patterns of divergence with gene flow. The absence of introgression and the nonexistence of DwGF in our genome scans, even with more liberal

thresholds, is surprising (Table S1). The further absence of allopatric selection suggests a diminished role of selection in deer speciation, lending support to drift-induced model more consistent with Mayr's (1942) view. While the number of windows in allopatric selection increased with more liberal thresholds (Table S1), they are never the dominant pattern. We suggest this absence could be a result of species being far along on the speciation continuum such that patterns of AS (specifically high  $F_{ST}$ ) are no longer detectable or meaningful, which is consistent with late stages of ecological speciation (Feder 2012). Recombination rates, demography and selection can influence the patterns investigated here (Shang et al. 2021), and thus future studies could integrate those factors to confirm the position of WTD & MD on the speciation continuum.

Signatures of balancing selection (BLS) were widespread with windows containing genes consistent with deer biology (olfactory receptors) and previous literature (i.e., MHC genes). The major histocompatibility complex (MHC) is involved in pathogen recognition in vertebrate species (Bernatchez and Landry 2003; Piertney and Oliver 2006). Polymorphism in this complex is directly linked to disease susceptibility, the most diverse are the most resistant, and there is evidence that MHC diversity is maintained by BLS (Bernatchez and Landry 2003; Piertney and Oliver 2006; Aguilar et al. 2004; Pierini and Lenz 2018; Zhang et al. 2018). The same is true for the results on sensory perception and particularly the olfactory receptors genes, both of which are under BLS (Liu et al. 2021). Each allele in the olfactory receptors genes is expressed by a single sensory neuron (Degl'Innocenti and D'Errico 2017), it is therefore plausible that diversity in these genes would be maintained by BLS. Olfactory receptors in WTD and MD, and more broadly deer, is critical to both predator detection and rutting behaviour (Ditchkoff 2011). Anatomically, WTD has an architecture optimised for the delivery of sensory stimuli to the

receptors in the nose (Ranslow et al. 2014). Chamaillé-Jammes et al. (2014) showed that MD inspect and respond differently to different predators' olfactory cues, and both human and mammalian predators utilize wind direction and other mechanism to minimize scent detection by deer (Zagata and Haugen 1974; Cherry and Barton 2017). In other ungulates species, olfactory reception is associated with sexual activity (Cann et al. 2019), maternal behaviour (Keller and Lévy 2012; Blank and Yang 2017), territory choice (Deutsch and Nefdt 1992), predator response (Kuijper et al. 2014; Wikenros et al. 2015) and foraging (Hirata and Kusatake 2021). Low differentiation ( $F_{ST}$ ) but high diversity ( $\pi$ ) of olfactory receptors in deer is consistent with their biology and behaviour and would be expected to be under strong selection pressures.

## Conclusion

Our results suggests that WTD & MD do not conform to a speciation with gene flow scenario despite evidence of contemporary hybridization. We propose they were spatially separated during the Quaternary glaciation cycles where genome-wide differentiation accrued via drift. This is evidenced by the majority of the genome (> 97%) not matching a selection scenario. Increased sampling and model-based demographic assessment should help clarify the role of glaciers and secondary contact in North American deer. The near absence of patterns of allopatry and hybridisation suggest that white-tailed and mule deer are far along the speciation continuum, the absence of introgression signs could suggest DMIs and selection against hybrids which would contribute to the reinforcement of reproductive isolation. Future studies should focus on assaying hybrid phenotypes and vigour.

## **Materials and Methods**

### **Sampling & Sequencing**

We obtained tissue samples from harvested deer collected across the range of WTD & MD including areas of sympatry and allopatry (Fig.1A, Table 1). These areas were determined from NatureServe records and adjusted with IUCN range data (IUCN 2015a; IUCN 2015b; NatureServe 2021a; NatureServe 2021b). Specifically, the state of Washington and the province of British Columbia, for which the coasts are largely MD allopatric whereas the eastern parts are sympatric, were divided in two by the 120<sup>th</sup> meridian West. We also removed Manitoba from the sympatric list given the area is quite small and not sampled. We extracted DNA from tissue using the Qiagen DNeasy Blood and Tissue Kit following manufacturer's instructions and checked the samples concentration using Invitrogen Qubit assays. WGS libraries were generated at The Centre for Applied Genomics in Toronto, Canada and sequenced to an average of 4x coverage on an Illumina HiSeqX.

## **Data processing**

Raw reads quality was examined using FastQC (v0.11.9; (Andrews S. 2010). We trimmed the reads using Trimmomatic (v0.36; Bolger et al., 2014), and aligned them to the WTD genome (GCA\_014726795.1) with bwa-mem (v0.7.17; Li & Durbin, 2009). We sorted the reads using SAMtools sort (v1.10; Li et al., 2009), identified duplicates reads with Picard MarkDuplicates (v2.23.2; Broad Institute, GitHub Repository., 2019) and removed them using Sambamba view (v0.7.0; Tarasov et al., 2015). We performed a local re-alignment using GATK RealignerTargetCreator and IndelRealigner (v4.1.7.0; McKenna et al., 2010). For further quality checks, we used Sambamba flagstat, mosdepth (v0.3.1; Pedersen and Quinlan 2018) and MultiQC (v1.10; Ewels et al., 2016). Some samples were sequenced to a higher depth on multiple lanes, for those samples, before the duplicate removal step, the read groups were specified and both sequencing files merged using Picard AddOrReplaceReadGroups and

MergeSamFiles. The rest of the pipeline was performed as described above with the addition of a final step: we reduced the final coverage to the average coverage of all other samples (4x) using Picard DownsampleSam.

We created three datasets for our different analyses. The first contained the variants among all deer individuals (hereafter called DeerSNP dataset). We produced it using ANGSD (v0.918; Korneliussen et al., 2014) and estimated genotype likelihoods following the GATK model (-gl 2) and called genotypes (-doGeno 4) with the following filtering: SNPs with a minimum p-value of  $1e^{-6}$ , a minimum base quality of 20 and Minimum mapQ quality of 20 (-SNP\_pval  $1e^{-6}$ , -minMapQ 20 & -minQ 20). The second dataset additionally included invariant sites (referred to as DeerALL), it was produced following the same method as DeerSNP except for the filtering on the SNP p-value (-SNP\_pval  $1e^{-6}$ ) which was removed. Our third dataset comprises the 28 deer individuals and one caribou sample, all mapped to the caribou genome (GCA\_014898785.1; afterwards called DeerCAR dataset). For this dataset, we first sorted the deer data by read name and converted them to fastq using SAMtools sort and fastq respectively. We mapped the deer data to the caribou reference genome using bwa-mem. We ran ANGSD using the same procedure as for DeerSNP dataset and with the addition of a caribou genome sequence obtained for this analysis (Dedato et al. 2022).

### Population structure analyses

To infer admixture proportions and compute a PCA on allele frequencies based on genotype likelihood data we used PCAngsd (Meisner and Albrechtsen 2018) and NGSadmix (Skotte et al. 2013) on the DeerSNP dataset. NGSadmix was run with  $K = 1$  up to  $K = 7$  and the best  $K$  value was determined with CLUMPAK (Kopelman et al. 2015) following the Evanno method (Evanno et al. 2005) with 7 replicates for each  $K$  value. We investigated the correlation between the

distribution on each PC and each individual's range in R with a linear model including the species and either latitude or longitude, and a Pearson's correlation.

### **Genome-wide introgression**

To evaluate the extent of introgression between sympatric MD and WTD, we used the ABBA-BABA test, which allows for the detection of introgression between three populations P1, P2 & P3 and an outgroup (Green et al. 2010; Durand et al. 2011). We ran the ABBA-BABA analysis implemented in ANGSD on the DeerCAR dataset between individuals (-doAbbababa 1) and between populations (-doAbbababa2 1; Soraggi et al. 2018), using the caribou as outgroup. The D-statistic, standard error and Z-score were computed with ANGSD's accompanying R scripts: jackKnife.R and estAvgError.R. To further our understanding of the admixture events and build a maximum likelihood tree of our system, we used treemix (v1.13; Pickrell & Pritchard, 2012) on both DeerCAR and DeerSNP datasets. We constructed the maximum likelihood trees with migration events ranging from 0 to 5, either WTD\_allopatry or Caribou as root, and accounted for linkage using 1000 SNPs per block. Tree and residuals visualisations were performed with associated R script plotting\_funcs.R and the variance explained by each migration event was computed with the get\_f() function.

### **In-windows introgression**

The D statistic is sensitive to genomic variation ( $\pi$ ), and should not be used to determine introgression on a small scale (Martin et al. 2015). The  $f_d$  statistic, proposed by Martin et al. (2015), is less dependent on diversity than D and therefore allows to detect potentially introgressed regions of the genome. We used the python script ABBABABAwindows.py (Martin 2021) to estimate in D and  $f_d$  in 50Kbp windows to detect potentially introgressed loci in our DeerCAR dataset on two comparisons: 1) P1 = WTD allopatry, P2 = WTD sympatry, P3 = MD

sympatry and 2) P1 = MD allopatry, P2 = MD sympatry, P3 = WTD sympatry, both with the caribou as outgroup. We then identified potentially introgressed windows as those having a  $f_d$  value higher than the 97.5% quantile. Their position was used in BEDTools intersect (v2.30.0; Quinlan and Hall 2010) with the caribou annotation file to identify the genes present in putatively introgressed windows.

### Genome scans

To detect islands of divergence between WTD & MD, we used the python script popgenWindows.py (Martin 2021) to estimate individual heterozygosity,  $F_{ST}$ ,  $D_{xy}$  and  $\pi$  in 50Kbp windows (note we filtered out scaffolds shorter than 50kb). The accurate computation of  $D_{xy}$  and  $\pi$  require a dataset including the invariant sites, we performed this analysis on the DeerALL dataset. To detect the outlier loci, we based our approach on the four selection scenarios developed in Shang et al. (2021): I) Divergence with gene flow that presents as high  $F_{ST}$  and  $D_{xy}$  but low  $\pi$ ; II) allopatric selection that shows high  $F_{ST}$ , low  $\pi$  and stable  $D_{xy}$ ; III) background selection that presents as high  $F_{ST}$  but low  $\pi$  and  $D_{xy}$ ; and IV) balancing selection that displays as low  $F_{ST}$  but high  $\pi$  and  $D_{xy}$ . Thresholds were set as the upper or lower 5% for a high or low criteria, and between 45 and 55% for a stable condition. Outliers were flagged as belonging to one of the four scenarios when they met the specific criteria shown in Table 2. For each scenario, we identified genes present in outlier regions by comparing the coordinates of the outlier windows and the WTD annotation file in BEDTools intersect. We extracted the gene names from those regions as well as those from their associated scaffolds. The gene list from outlier windows was uploaded to ShinyGO for enrichment analysis with the scaffold's gene list as background information. We downloaded the enrichment analysis results for the molecular function, biological process, and cellular component GOs and analysed the results in R. We



also uploaded the gene list to UniProt's Retrieve/ID mapping tool (Pundir et al. 2016) and downloaded the information for visual inspection. All results were analysed in R version 4.1.0 "Camp Pontanezen" (R Core Team 2021) .

### ***Data availability***

Raw reads for the 28 deer individuals were deposited on the NCBI Sequence Read Archive (Accession number XXXX). All scripts are available on GitLab ([https://gitlab.com/WiDGeT\\_TrentU/graduate\\_theses/-/tree/master/Kessler/CH\\_01](https://gitlab.com/WiDGeT_TrentU/graduate_theses/-/tree/master/Kessler/CH_01))

### ***Acknowledgements***

Camille Kessler was supported by an International Graduate Scholarship. Eric Wootton was supported by three Natural Sciences and Engineering Research Council (NSERC) Undergraduate Student Research Awards. This work was supported by NSERC Discovery Grant; ComputeCanada Resources for Research Groups; Canadian Foundation for Innovation: John R. Evans Leaders Fund and the Ontario Early Researcher Award. We thank Catherine Cullingham, Anh Dao, Orrin Duvuvuei, Brad Fulk, Steve Griffin, Levi Jaster, Lee Jeffers, Emily Latch, the NRDPFC, Charles Ruth, David Walter, Geoff Williams, Kevin White, Mark Wong, Kiana Young and Liana Zanette, for providing samples. We are also grateful to Andrew Foote, Jose Alberto Lòpez Alemàn and Emily Latch for their precious comments on the manuscript.

## References

- Abbott R, Albach D, Ansell S, Arntzen JW, Baird SJE, Bierne N, Boughman J, Brelsford A, Buerkle CA, Buggs R, et al. 2013. Hybridization and speciation. *J. Evol. Biol.* 26:229–246.
- Adams KP, Hamilton RJ. 2011. Management History. In: Hewitt DG, editor. Biology and management of white-tailed deer. Boca Raton: CRC Press. Available from: <http://site.ebrary.com/id/11007093>
- Adavoudi R, Pilot M. 2021. Consequences of Hybridization in Mammals: A Systematic Review. *Genes* 13:50.
- Aguilar A, Roemer G, Debenham S, Binns M, Garcelon D, Wayne RK. 2004. High MHC diversity maintained by balancing selection in an otherwise genetically monomorphic mammal. *Proc. Natl. Acad. Sci. U.S.A.* 101:3490–3494.
- Alminas OSV, Heffelfinger JR, Statham MJ, Latch EK. 2021. Phylogeography of Cedros and Tiburón Island Mule Deer in North America’s Desert Southwest. Murphy WJ, editor. *Journal of Heredity* 112:260–275.
- Andrews S. 2010. FastQC: a quality control tool for high throughput sequence data. Available online at: <http://www.bioinformatics.babraham.ac.uk/projects/fastqc>.
- Anthony RG, Smith NS. 1977. Ecological Relationships between Mule Deer and White-Tailed Deer in Southeastern Arizona. *Ecological Monographs* 47:255–277.
- Awise JC, Walker D, Johns GC. 1998. Speciation durations and Pleistocene effects on vertebrate phylogeography. *Proc. R. Soc. Lond. B* 265:1707–1712.
- Bernatchez L, Landry C. 2003. MHC studies in nonmodel vertebrates: what have we learned about natural selection in 15 years? *Journal of Evolutionary Biology* 16:363–377.
- Berry SL, Shipley LA, Long RA, Loggers C. 2019. Differences in dietary niche and foraging behavior of sympatric mule and white-tailed deer. *Ecosphere* [Internet] 10. Available from: <https://onlinelibrary.wiley.com/doi/abs/10.1002/ecs2.2815>
- Blank DA, Yang W. 2017. Mother-young recognition in goitered gazelle during hiding period. *Behavioural Processes* 142:21–28.
- Bolger AM, Lohse M, Usadel B. 2014. Trimmomatic: a flexible trimmer for Illumina sequence data. *Bioinformatics* 30:2114–2120.
- Booker TR, Yeaman S, Whitlock MC. 2021. Global adaptation complicates the interpretation of genome scans for local adaptation. *Evolution Letters* 5:4–15.
- Bradley RD, Bryant FC, Bradley LC, Haynie ML, Baker RJ. 2003. IMPLICATIONS OF HYBRIDIZATION BETWEEN WHITE-TAILED DEER AND MULE DEER. *The Southwestern Naturalist* 48:7.

- 404 Broad Institute, GitHub Repository. 2019. “Picard Toolkit.” Available from:  
405 <http://broadinstitute.github.io/picard/>
- 406 Brunjes KJ, Ballard WB, Humphrey MH, Harwell F, McIntyre NE, Krausman PR, Wallace MC. 2006.  
407 Habitat Use by Sympatric Mule and White-Tailed Deer in Texas. *Journal of Wildlife*  
408 *Management* 70:1351–1359.
- 409 Budd K, Berkman LK, Anderson M, Koppelman J, Eggert LS. 2018. Genetic structure and  
410 recovery of white-tailed deer in Missouri: Genetic Structure of Deer in Missouri. *Jour.*  
411 *Wild. Mgmt.* 82:1598–1607.
- 412 Burri R. 2017. Interpreting differentiation landscapes in the light of long-term linked selection:  
413 DIFFERENTIATION AND LONG-TERM LINKED SELECTION. *Evolution Letters* 1:118–131.
- 414 Cambronne A. 2013. Deerland: America’s hunt for ecological balance and the essence of  
415 wildness. Available from:  
416 <http://www.freading.com/ebooks/details/r:download/MDAwMDA5LTEwOTA1NDYz>
- 417 Campbell CR, Poelstra JW, Yoder AD. 2018. What is Speciation Genomics? The roles of ecology,  
418 gene flow, and genomic architecture in the formation of species. *Biological Journal of*  
419 *the Linnean Society* 124:561–583.
- 420 Cann P, Chabi M, Delsart A, Le Danvic C, Saliou J-M, Chasles M, Keller M, Nagnan-Le Meillour P.  
421 2019. The olfactory secretome varies according to season in female sheep and goat.  
422 *BMC Genomics* 20:794.
- 423 Carr SM, Ballinger SW, Derr JN, Blankenship LH, Bickham JW. 1986. Mitochondrial DNA analysis  
424 of hybridization between sympatric white-tailed deer and mule deer in west Texas.  
425 *Proceedings of the National Academy of Sciences* 83:9576–9580.
- 426 Carr SM, Hughes GA. 1993. Direction of Introgressive Hybridization between Species of North  
427 American Deer (*Odocoileus*) as Inferred from Mitochondrial-Cytochrome-b Sequences.  
428 *Journal of Mammalogy* 74:331–342.
- 429 Cathey JC, Bickham JW, Patton JC. 1998. INTROGRESSIVE HYBRIDIZATION AND  
430 NONCONCORDANT EVOLUTIONARY HISTORY OF MATERNAL AND PATERNAL LINEAGES  
431 IN NORTH AMERICAN DEER. *Evolution* 52:1224–1229.
- 432 Chafin TK, Zbinden ZD, Douglas MR, Martin BT, Middaugh CR, Gray MC, Ballard JR, Douglas ME.  
433 2021. Spatial population genetics in heavily managed species: Separating patterns of  
434 historical translocation from contemporary gene flow in white-tailed deer. *Evol Appl*  
435 14:1673–1689.
- 436 Chamaillé-Jammes S, Malcuit H, Le Saout S, Martin J-L. 2014. Innate threat-sensitive foraging:  
437 black-tailed deer remain more fearful of wolf than of the less dangerous black bear  
438 even after 100 years of wolf absence. *Oecologia* 174:1151–1158.
- 439 Cherry MJ, Barton BT. 2017. Effects of wind on predator-prey interactions. *Food Webs* 13:92–97.

- 440 Colella JP, Lan T, Talbot SL, Lindqvist C, Cook JA. 2021. Whole-genome resequencing reveals  
441 persistence of forest-associated mammals in Late Pleistocene refugia along North  
442 America's North Pacific Coast. *J. Biogeogr.* 48:1153–1169.
- 443 Combe FJ, Jaster L, Ricketts A, Haukos D, Hope AG. 2021. Population genomics of free-ranging  
444 Great Plains white-tailed and mule deer reflects a long history of inter-specific  
445 hybridization. *Evolutionary Applications*:eva.13330.
- 446 Cronin MA. 1991. Mitochondrial and nuclear genetic relationships of deer (*Odocoileus* spp.) in  
447 western North America. *Can. J. Zool.* 69:1270–1279.
- 448 Cronin MA, Vyse ER, Cameron DG. 1988. Genetic Relationships between Mule Deer and White-  
449 Tailed Deer in Montana. *The Journal of Wildlife Management* 52:320.
- 450 Cruickshank TE, Hahn MW. 2014. Reanalysis suggests that genomic islands of speciation are  
451 due to reduced diversity, not reduced gene flow. *Mol Ecol* 23:3133–3157.
- 452 Cutter AD. 2013. Integrating phylogenetics, phylogeography and population genetics through  
453 genomes and evolutionary theory. *Molecular Phylogenetics and Evolution* 69:1172–  
454 1185.
- 455 Darwin C 1809-1882. 1859. On the origin of species by means of natural selection, or  
456 preservation of favoured races in the struggle for life. London: John Murray, 1859  
457 Available from: <https://search.library.wisc.edu/catalog/9934839413602122>
- 458 Dedato M, Robert C, Taillon J, Shafer A, Cote S. 2022. Demographic history and conservation  
459 genomics of caribou (*Rangifer tarandus*) in Québec. Preprints Available from:  
460 [https://www.authorea.com/users/407174/articles/552124-demographic-history-and-](https://www.authorea.com/users/407174/articles/552124-demographic-history-and-conservation-genomics-of-caribou-rangifer-tarandus-in-qu%C3%A9bec?commit=d3fe88936f0714b1711f9dba33bc149835a4aba3)  
461 [conservation-genomics-of-caribou-rangifer-tarandus-in-](https://www.authorea.com/users/407174/articles/552124-demographic-history-and-conservation-genomics-of-caribou-rangifer-tarandus-in-qu%C3%A9bec?commit=d3fe88936f0714b1711f9dba33bc149835a4aba3)  
462 [qu%C3%A9bec?commit=d3fe88936f0714b1711f9dba33bc149835a4aba3](https://www.authorea.com/users/407174/articles/552124-demographic-history-and-conservation-genomics-of-caribou-rangifer-tarandus-in-qu%C3%A9bec?commit=d3fe88936f0714b1711f9dba33bc149835a4aba3)
- 463 Degl'Innocenti A, D'Errico A. 2017. Regulatory Features for Odorant Receptor Genes in the  
464 Mouse Genome. *Frontiers in Genetics* 8:8.
- 465 Derr JN. 1991. Genetic Interactions between White-Tailed and Mule Deer in the Southwestern  
466 United States. *The Journal of Wildlife Management* 55:228.
- 467 Derr JN, Hale DW, Ellsworth DL, Bickham JW. 1991. Fertility in an F1 male hybrid of white-tailed  
468 deer (*Odocoileus virginianus*) \m=x\mule deer (*O. hemionus*). :7.
- 469 Deutsch JC, Nefdt RJC. 1992. Olfactory cues influence female choice in two lek-breeding  
470 antelopes. *Nature* 356:596–598.
- 471 DeYoung RW, Demarais S, Gee KL, Honeycutt RL, Hellickson MW, Gonzales RA. 2009. Molecular  
472 Evaluation of the White-tailed Deer (*Odocoileus Virginianus*) Mating System. *Journal of*  
473 *Mammalogy* 90:946–953.

474 DeYoung RW, Demarais S, Honeycutt RL, Gee KL, Gonzales RA. 2006. Social Dominance and  
475 Male Breeding Success in Captive White-Tailed Deer. *Wildlife Society Bulletin* 34:131–  
476 136.

477 Deyoung RW, Demarais S, Honeycutt RL, Rooney AP, Gonzales RA, Gee KL. 2003. Genetic  
478 consequences of white-tailed deer ( *Odocoileus virginianus* ) restoration in Mississippi.  
479 *Molecular Ecology* 12:3237–3252.

480 Ditchkoff SS. 2011. Anatomy and Physiology. In: Hewitt DG, editor. Biology and management  
481 of white-tailed deer. Boca Raton: CRC Press. Available from:  
482 <http://site.ebrary.com/id/11007093>

483 Douzery E, Randi E. 1997. The mitochondrial control region of Cervidae: evolutionary patterns  
484 and phylogenetic content. *Molecular Biology and Evolution* 14:1154–1166.

485 Durand EY, Patterson N, Reich D, Slatkin M. 2011. Testing for Ancient Admixture between  
486 Closely Related Populations. *Molecular Biology and Evolution* 28:2239–2252.

487 Dussex N, Alberti F, Heino MT, Olsen R-A, van der Valk T, Ryman N, Laikre L, Ahlgren H, Askeyev  
488 IV, Askeyev OV, et al. 2020. Moose genomes reveal past glacial demography and the  
489 origin of modern lineages. *BMC Genomics* 21:854.

490 Ellsworth DL, Honeycutt RL, Silvy NJ, Bickham JW, Klimstra WD. 1994. HISTORICAL  
491 BIOGEOGRAPHY AND CONTEMPORARY PATTERNS OF MITOCHONDRIAL DNA  
492 VARIATION IN WHITE-TAILED DEER FROM THE SOUTHEASTERN UNITED STATES.  
493 *Evolution* 48:122–136.

494 Evanno G, Regnaut S, Goudet J. 2005. Detecting the number of clusters of individuals using the  
495 software structure: a simulation study. *Mol Ecol* 14:2611–2620.

496 Ewels P, Magnusson M, Lundin S, Käller M. 2016. MultiQC: summarize analysis results for  
497 multiple tools and samples in a single report. *Bioinformatics* 32:3047–3048.

498 Feder JL. 2012. The genomics of speciation-with-gene-flow. 28:9.

499 Gilbert C, Ropiquet A, Hassanin A. 2006. Mitochondrial and nuclear phylogenies of Cervidae  
500 (Mammalia, Ruminantia): Systematics, morphology, and biogeography. *Molecular*  
501 *Phylogenetics and Evolution* 40:101–117.

502 Green RE, Krause J, Briggs AW, Maricic T, Stenzel U, Kircher M, Patterson N, Li H, Zhai W, Fritz  
503 MHY, et al. 2010. A Draft Sequence of the Neandertal Genome. *Science* 328:710–722.

504 Hewitt G. 2000. The genetic legacy of the Quaternary ice ages. *Nature* 405:907–913.

505 Hirata M, Kusatake N. 2021. Relative importance of senses in forage discrimination by cattle  
506 depends on the sensory contrast between the discrimination targets: a preliminary  
507 study. *Anim Cogn* 24:99–106.

508 Hornbeck GE, Mahoney JM. 2000. Introgressive Hybridization of Mule Deer and White-Tailed  
509 Deer in Southwestern Alberta. :5.

510 Hughes GA, Carr SM. 1993. Reciprocal hybridization between white-tailed deer ( *Odocoileus*  
511 *virginianus* ) and mule deer ( *O. hemionus* ) in western Canada: evidence from serum  
512 albumin and mtDNA sequences. *Can. J. Zool.* 71:524–530.

513 Iacolina L, Corlatti L, Buzan E, Safner T, Šprem N. 2019. Hybridisation in European ungulates:  
514 an overview of the current status, causes, and consequences. *Mam Rev* 49:45–59.

515 Ito T, Hayakawa T, Suzuki-Hashido N, Hamada Y, Kurihara Y, Hanya G, Kaneko A, Natsume T,  
516 Aisu S, Honda T, et al. 2021. Phylogeographic history of Japanese macaques. *J*  
517 *Biogeogr*:jbi.14087.

518 IUCN. 2015a. *Odocoileus virginianus*: Gallina, S. and Lopez Arevalo, H.: The IUCN Red List of  
519 Threatened Species 2016: e.T42394A22162580. Available from:  
520 <http://www.iucnredlist.org/details/42394/0>

521 IUCN. 2015b. *Odocoileus hemionus*: Sanchez Rojas, G. and Gallina Tessaro, S.: The IUCN Red  
522 List of Threatened Species 2016: e.T42393A22162113. Available from:  
523 <http://www.iucnredlist.org/details/42393/0>

524 Jones PD, Strickland BK, Demarais S, DeYoung RW. 2011. Inconsistent association of male body  
525 mass with breeding success in captive white-tailed deer. *J Mammal* 92:527–533.

526 Keller M, Lévy F. 2012. The main but not the accessory olfactory system is involved in the  
527 processing of socially relevant chemosignals in ungulates. *Front. Neuroanat.* [Internet]  
528 6. Available from:  
529 <http://journal.frontiersin.org/article/10.3389/fnana.2012.00039/abstract>

530 Kinoshita E, Kosintsev PA, Abramov AV, Solovyev VA, Saveljev AP, Nishita Y, Masuda R. 2020.  
531 Holocene changes in the distributions of Asian and European badgers (Carnivora:  
532 Mustelidae: Meles) inferred from ancient DNA analysis. *Biological Journal of the Linnean*  
533 *Society* 129:594–602.

534 Kopelman NM, Mayzel J, Jakobsson M, Rosenberg NA, Mayrose I. 2015. CLUMPAK: a program for  
535 identifying clustering modes and packaging population structure inferences across K.  
536 *Mol Ecol Resour* 15:1179–1191.

537 Korneliussen TS, Albrechtsen A, Nielsen R. 2014. ANGSD: Analysis of Next Generation  
538 Sequencing Data. *BMC Bioinformatics* 15:356.

539 Kuijper DPJ, Verwijmeren M, Churski M, Zbyryt A, Schmidt K, Jędrzejewska B, Smit C. 2014. What  
540 Cues Do Ungulates Use to Assess Predation Risk in Dense Temperate Forests? Sueur C,  
541 editor. *PLoS ONE* 9:e84607.

542 Latch EK, Heffelfinger JR, Fike JA, RHODES Jr OE. 2009. Species-wide phylogeography of North  
543 American mule deer ( *Odocoileus hemionus* ): cryptic glacial refugia and postglacial  
544 recolonization. *Molecular Ecology* 18:1730–1745.

545 Latch EK, Reding DM, Heffelfinger JR, Alcalá-Galván CH, Rhodes OE. 2014. Range-wide analysis  
546 of genetic structure in a widespread, highly mobile species ( *Odocoileus hemionus* )  
547 reveals the importance of historical biogeography. *Mol Ecol* 23:3171–3190.

548 Lavretsky P, DaCosta JM, Sorenson MD, McCracken KG, Peters JL. 2019. ddRAD-seq data reveal  
549 significant genome-wide population structure and divergent genomic regions that  
550 distinguish the mallard and close relatives in North America. *Mol Ecol* 28:2594–2609.

551 Li H, Durbin R. 2009. Fast and accurate short read alignment with Burrows-Wheeler transform.  
552 *Bioinformatics* 25:1754–1760.

553 Li H, Handsaker B, Wysoker A, Fennell T, Ruan J, Homer N, Marth G, Abecasis G, Durbin R, 1000  
554 Genome Project Data Processing Subgroup. 2009. The Sequence Alignment/Map  
555 format and SAMtools. *Bioinformatics* 25:2078–2079.

556 Lingle S. 1992. Escape Gaits of White-Tailed Deer, Mule Deer and Their Hybrids: Gaits Observed  
557 and Patterns of Limb Coordination. *Behaviour* 122:153–181.

558 Lingle S. 2001. Anti-Predator Strategies and Grouping Patterns in White-Tailed Deer and Mule  
559 Deer. *Ethology* 107:295–314.

560 Lingle S. 2003. Group composition and cohesion in sympatric white-tailed deer and mule deer.  
561 *Can. J. Zool.* 81:1119–1130.

562 Liu Q, Mishra M, Saxena AS, Wu H, Qiu Y, Zhang X, You X, Ding S, Miyamoto MM. 2021. Balancing  
563 selection maintains ancient polymorphisms at conserved enhancers for the olfactory  
564 receptor genes of a Chinese marine fish. *Mol Ecol* 30:4023–4038.

565 Mallet J. 2005. Hybridization as an invasion of the genome. *Trends in Ecology & Evolution*  
566 20:229–237.

567 Marques DA, Lucek K, Sousa VC, Excoffier L, Seehausen O. 2019. Admixture between old  
568 lineages facilitated contemporary ecological speciation in Lake Constance stickleback.  
569 *Nat Commun* 10:4240.

570 Martin S. 2021. genomics\_general. *GitHub* [Internet]. Available from:  
571 [https://github.com/simonhmartin/genomics\\_general](https://github.com/simonhmartin/genomics_general)

572 Martin SH, Davey JW, Jiggins CD. 2015. Evaluating the Use of ABBA–BABA Statistics to Locate  
573 Introgressed Loci. *Molecular Biology and Evolution* 32:244–257.

574 Mayr E. 1942. Systematics and the Origin of Species.



575 McDonald JS, Miller KV, Association QDM, Resources DBWS of F. 2004. A History of White-tailed  
576 Deer Restocking in the United States, 1878 to 2004. Quality Deer Management Assoc.  
577 Available from: [https://books.google.ca/books?id=fv\\_oGwAACAAJ](https://books.google.ca/books?id=fv_oGwAACAAJ)

578 McKenna A, Hanna M, Banks E, Sivachenko A, Cibulskis K, Kernytsky A, Garimella K, Altshuler D,  
579 Gabriel S, Daly M, et al. 2010. The Genome Analysis Toolkit: A MapReduce framework  
580 for analyzing next-generation DNA sequencing data. *Genome Research* 20:1297–1303.

581 Meisner J, Albrechtsen A. 2018. Inferring Population Structure and Admixture Proportions in  
582 Low-Depth NGS Data. *Genetics* 210:719–731.

583 Momigliano P, Jokinen H, Fraimout A, Florin A-B, Norkko A, Merilä J. 2017. Extraordinarily rapid  
584 speciation in a marine fish. :6.

585 Morina DL, Demarais S, Strickland BK, Larson JE. 2018. While males fight, females choose: male  
586 phenotypic quality informs female mate choice in mammals. *Animal Behaviour* 138:69–  
587 74.

588 Moscarella RA, Aguilera M, Escalante AA. 2003. PHYLOGEOGRAPHY, POPULATION STRUCTURE,  
589 AND IMPLICATIONS FOR CONSERVATION OF WHITE-TAILED DEER (ODOCOILEUS  
590 VIRGINIANUS) IN VENEZUELA. *Journal of Mammalogy* 84:1300–1315.

591 NatureServe. 2021a. NatureServe Explorer. *NatureServe Mule Deer* [Internet]. Available from:  
592 [https://explorer.natureserve.org/Taxon/ELEMENT\\_GLOBAL.2.101365/Odocoileus\\_hemionus](https://explorer.natureserve.org/Taxon/ELEMENT_GLOBAL.2.101365/Odocoileus_hemionus)  
593

594 NatureServe. 2021b. NatureServe Explorer [web application] WTD. *NatureServe, Arlington,*  
595 *Virginia* [Internet]. Available from:  
596 [https://explorer.natureserve.org/Taxon/ELEMENT\\_GLOBAL.2.104777/Odocoileus\\_virginianus](https://explorer.natureserve.org/Taxon/ELEMENT_GLOBAL.2.104777/Odocoileus_virginianus)  
597

598 Newbolt CH, Acker PK, Neuman TJ, Hoffman SI, Ditchkoff SS, Steury TD. 2017. Factors  
599 influencing reproductive success in male white-tailed deer: Male Breeding Success in  
600 Deer. *Jour. Wild. Mgmt.* 81:206–217.

601 Nosil P. 2012. Ecological speciation. Oxford ; New York: Oxford University Press

602 Pedersen BS, Quinlan AR. 2018. Mosdepth: quick coverage calculation for genomes and  
603 exomes. Hancock J, editor. *Bioinformatics* 34:867–868.

604 Peres TM, Altman H. 2018. The magic of improbable appendages: Deer antler objects in the  
605 archaeological record of the American South. *Journal of Archaeological Science: Reports* 20:888–895.  
606

607 Pickrell JK, Pritchard JK. 2012. Inference of Population Splits and Mixtures from Genome-Wide  
608 Allele Frequency Data. Tang H, editor. *PLoS Genet* 8:e1002967.



609 Pierini F, Lenz TL. 2018. Divergent Allele Advantage at Human MHC Genes: Signatures of Past  
610 and Ongoing Selection. Wilke C, editor. *Molecular Biology and Evolution* 35:2145–2158.

611 Piertney SB, Oliver MK. 2006. The evolutionary ecology of the major histocompatibility  
612 complex. *Heredity* 96:7–21.

613 Pitra C, Fickel J, Meijaard E, Groves C. 2004. Evolution and phylogeny of old world deer.  
614 *Molecular Phylogenetics and Evolution* 33:880–895.

615 Poelstra JW, Vijay N, Bossu CM, Lantz H, Ryll B, Muller I, Baglione V, Unneberg P, Wikelski M,  
616 Grabherr MG, et al. 2014. The genomic landscape underlying phenotypic integrity in the  
617 face of gene flow in crows. *Science* 344:1410–1414.

618 Pundir S, Martin MJ, O'Donovan C, The UniProt Consortium. 2016. UniProt Tools. *Current*  
619 *Protocols in Bioinformatics* [Internet] 53. Available from:  
620 <https://onlinelibrary.wiley.com/doi/10.1002/0471250953.bi0129s53>

621 Quinlan AR, Hall IM. 2010. BEDTools: a flexible suite of utilities for comparing genomic features.  
622 *Bioinformatics* 26:841–842.

623 R Core Team. 2021. R: A Language and Environment for Statistical Computing. Vienna, Austria:  
624 R Foundation for Statistical Computing Available from: <https://www.R-project.org/>

625 Ragavan P, Zhou R, Ng WL, Rana TS, Mageswaran T, Mohan PM, Saxena A. 2017. Natural  
626 hybridization in mangroves – an overview. *Botanical Journal of the Linnean Society*  
627 185:208–224.

628 Ranslow AN, Richter JP, Neuberger T, Van Valkenburgh B, Rumple CR, Quigley AP, Pang B,  
629 Krane MH, Craven BA. 2014. Reconstruction and Morphometric Analysis of the Nasal  
630 Airway of the White-Tailed Deer ( *Odocoileus virginianus* ) and Implications Regarding  
631 Respiratory and Olfactory Airflow: White-Tailed Deer Nasal Anatomy and Function.  
632 *Anat. Rec.* 297:2138–2147.

633 Ravinet M, Faria R, Butlin RK, Galindo J, Bierne N, Rafajlović M, Noor MAF, Mehlig B, Westram  
634 AM. 2017. Interpreting the genomic landscape of speciation: a road map for finding  
635 barriers to gene flow. *J. Evol. Biol.* 30:1450–1477.

636 Rundle HD, Nosil P. 2005. Ecological speciation: Ecological speciation. *Ecology Letters* 8:336–  
637 352.

638 Russell T, Cullingham C, Ball M, Pybus M, Coltman D. 2021. Extent and direction of introgressive  
639 hybridization of mule and white-tailed deer in western Canada. *Evol Appl*:eva.13250.

640 Russell T, Cullingham C, Kommadath A, Stothard P, Herbst A, Coltman D. 2019. Development  
641 of a Novel Mule Deer Genomic Assembly and Species-Diagnostic SNP Panel for  
642 Assessing Introgression in Mule Deer, White-Tailed Deer, and Their Interspecific  
643 Hybrids. G3:200838.2018.

644 Schumer M, Cui R, Rosenthal GG, Andolfatto P. 2015. Reproductive Isolation of Hybrid  
645 Populations Driven by Genetic Incompatibilities. Payseur BA, editor. *PLoS Genet*  
646 11:e1005041.

647 Servedio MR. 2004. THE EVOLUTION OF PREMATING ISOLATION: LOCAL ADAPTATION AND  
648 NATURAL AND SEXUAL SELECTION AGAINST HYBRIDS. *Evolution* 58:913–924.

649 Shafer ABA, Cullingham CI, Côté SD, Coltman DW. 2010. Of glaciers and refugia: a decade of  
650 study sheds new light on the phylogeography of northwestern North America.  
651 *Molecular Ecology* 19:4589–4621.

652 Shafer ABA, Wolf JBW. 2013. Widespread evidence for incipient ecological speciation: a meta-  
653 analysis of isolation-by-ecology. Wiens J, editor. *Ecol Lett* 16:940–950.

654 Shang H, Rendón-Anaya M, Paun O, Field DL, Hess J, Vogl C, Liu J, Ingvarsson PK, Lexer C, Leroy  
655 T. 2021. Conserved genomic landscapes of differentiation across *Populus* speciation  
656 continuum. *Evolutionary Biology* Available from:  
657 <http://biorxiv.org/lookup/doi/10.1101/2021.08.26.457771>

658 Skotte L, Korneliussen TS, Albrechtsen A. 2013. Estimating Individual Admixture Proportions  
659 from Next Generation Sequencing Data. *Genetics* 195:693–702.

660 Soraggi S, Wiuf C, Albrechtsen A. 2018. Powerful inference with the D-statistic on low-coverage  
661 whole-genome data. *G3: Genes, Genomes, Genetics* 8.

662 Stankowski S, Ravinet M. 2021. Defining the speciation continuum. *Evolution* 75:1256–1273.

663 Stubblefield SS, Warren RJ, Murphy BR. 1986. Hybridization of Free-Ranging White-Tailed and  
664 Mule Deer in Texas. *The Journal of Wildlife Management* 50:688.

665 Tarasov A, Vilella AJ, Cuppen E, Nijman IJ, Prins P. 2015. Sambamba: fast processing of NGS  
666 alignment formats. *Bioinformatics* 31:2032–2034.

667 Taylor SA, Larson EL. 2019. Insights from genomes into the evolutionary importance and  
668 prevalence of hybridization in nature. *Nat Ecol Evol* 3:170–177.

669 UniProt. 2022a. Q9Y5E5 · PCDB4\_HUMAN. *UniProt beta* [Internet]. Available from:  
670 <https://beta.uniprot.org/uniprotkb/Q9Y5E5/entry>

671 UniProt. 2022b. Q15057 · ACAP2\_HUMAN. *UniProt beta* [Internet]. Available from:  
672 <https://beta.uniprot.org/uniprotkb/Q15057/entry>

673 Whittaker DG, Lindzey FG. 2004. Habitat use patterns of sympatric deer species on Rocky  
674 Mountain Arsenal, Colorado. *Wildlife Society Bulletin* 32:1114–1123.

675 Wikenros C, Kuijper DPJ, Behnke R, Schmidt K. 2015. Behavioural responses of ungulates to  
676 indirect cues of an ambush predator. *Behav* 152:1019–1040.

677 Wishart WD. 1980. Hybrids of White-Tailed and Mule Deer in Alberta. *Journal of Mammalogy*  
678 61:716–719.

679 Wright CA, McRoberts JT, Rota CT, Wiskirchen KH, Keller BJ, Millspaugh JJ. 2021. Female White-  
680 tailed deer ( *Odocoileus virginianus* ) Behavior During Pregnancy, Parturition, and  
681 Lactation in 2 Contrasting Ecoregions. *Wildl. Soc. bull.:*wsb.1207.

682 Wright EA, Roberts EK, Platt RN, Bayouth JV, Conway WC, Bradley RD. 2022. Mitochondrial  
683 capture and subsequent genetic divergence generates a novel haplogroup: evidence  
684 from ancient and ongoing hybridization in mule and white-tailed deer. Jezkova T,  
685 editor. *Journal of Mammalogy*:gyab156.

686 Zagata MD, Haugen AO. 1974. Influence of Light and Weather on Observability of Iowa Deer.  
687 *The Journal of Wildlife Management* 38:220.

688 Zhang P, Huang K, Zhang B, Dunn DW, Chen D, Li F, Qi X, Guo S, Li B. 2018. High polymorphism  
689 in MHC-DRB genes in golden snub-nosed monkeys reveals balancing selection in small,  
690 isolated populations. *BMC Evol Biol* 18:29.

691

692

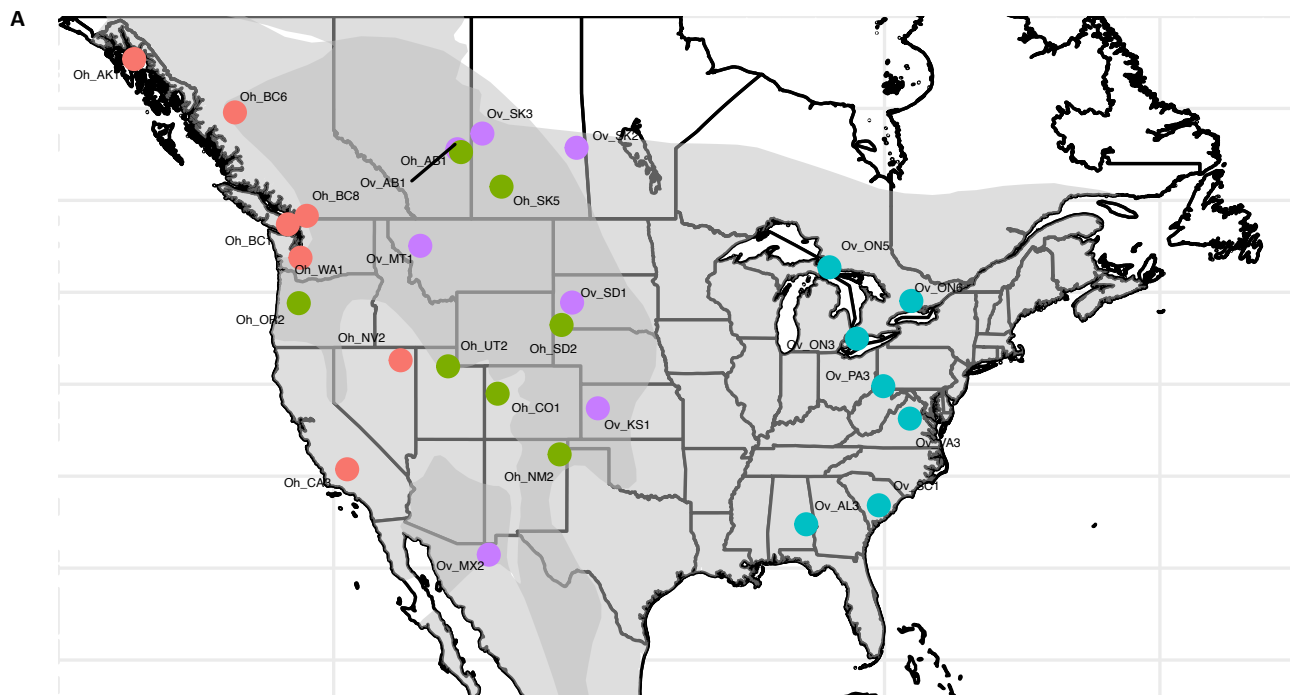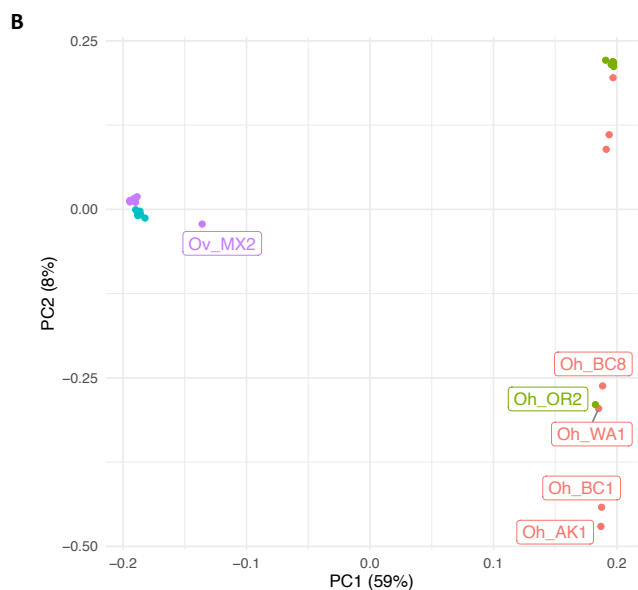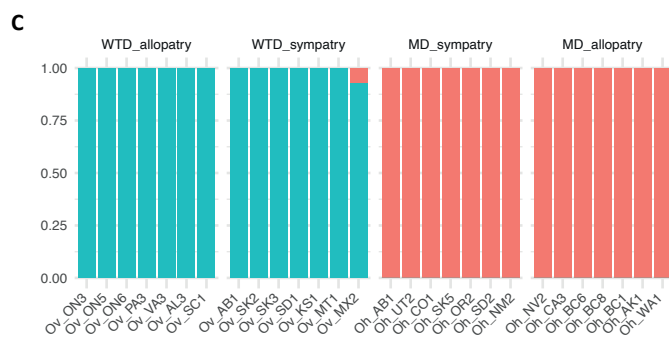

A

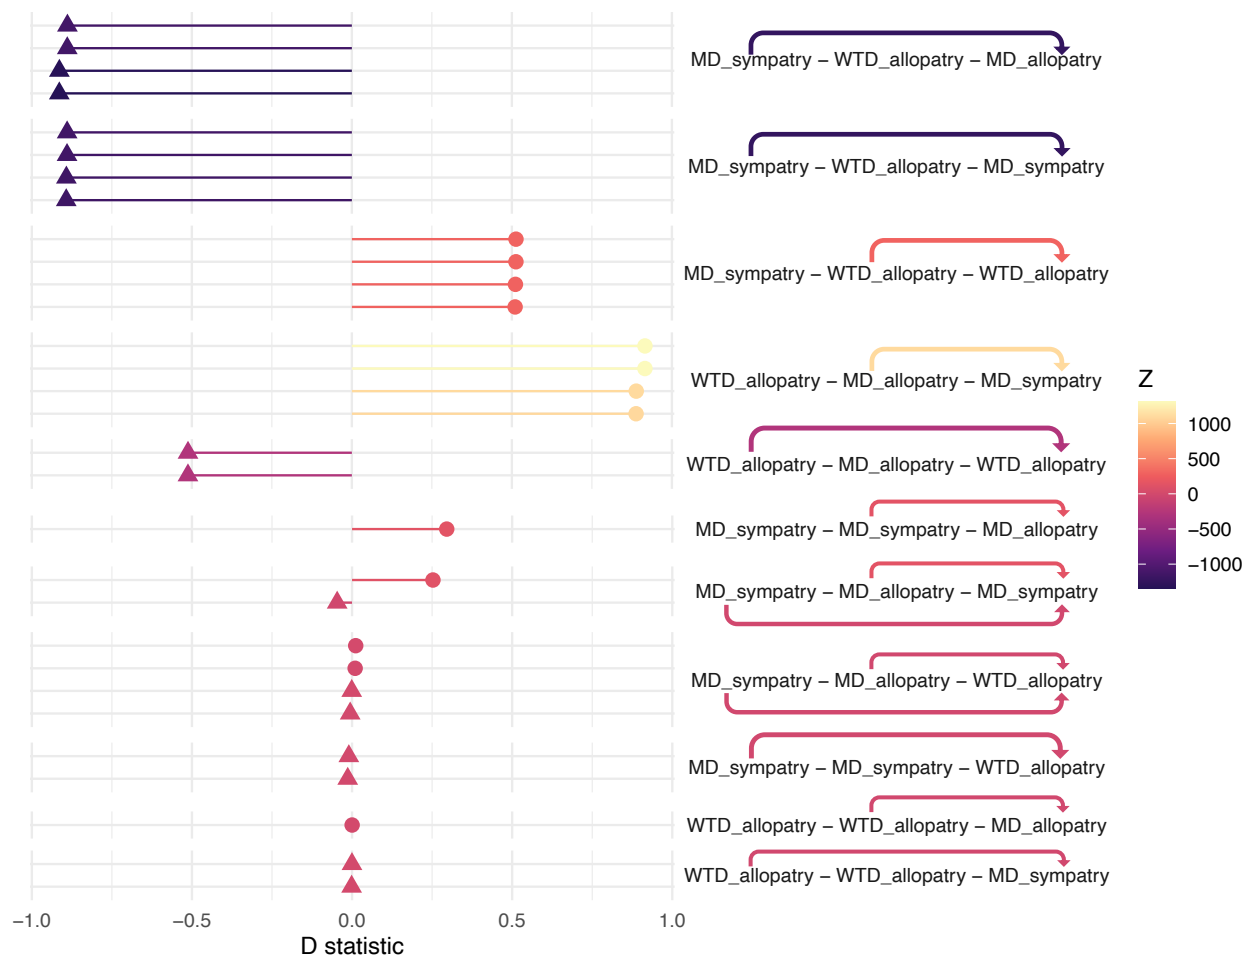

B

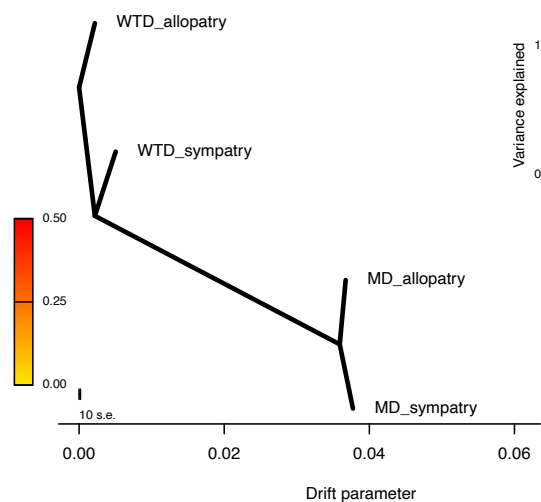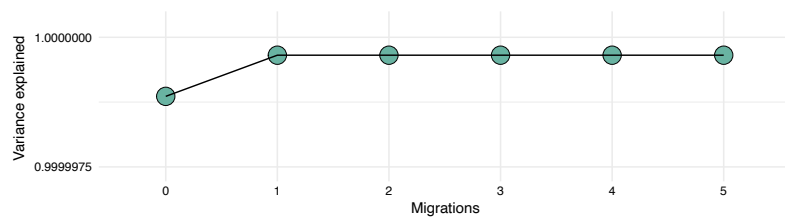

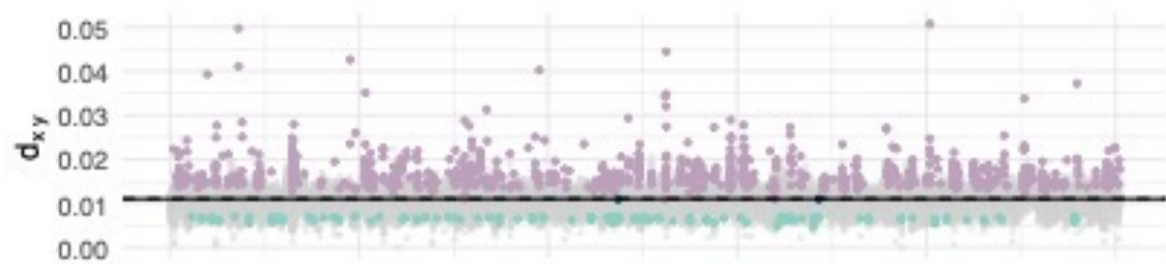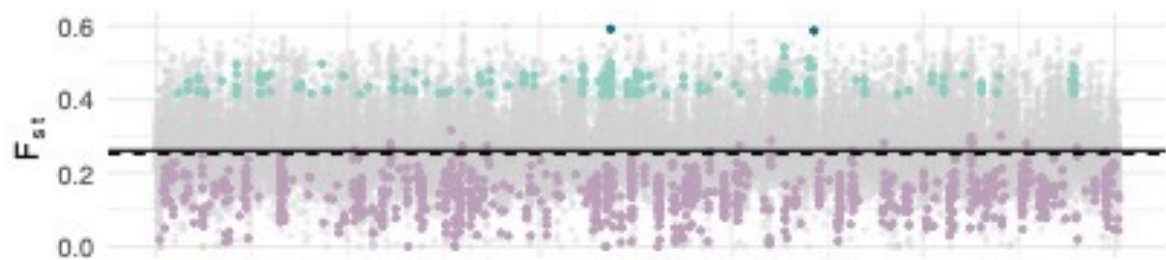

WTD

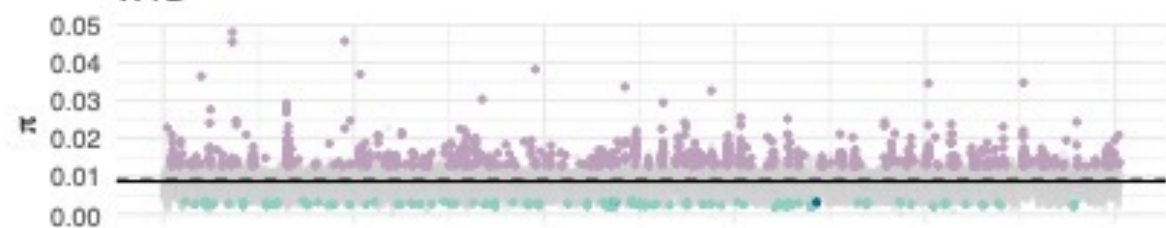

MD

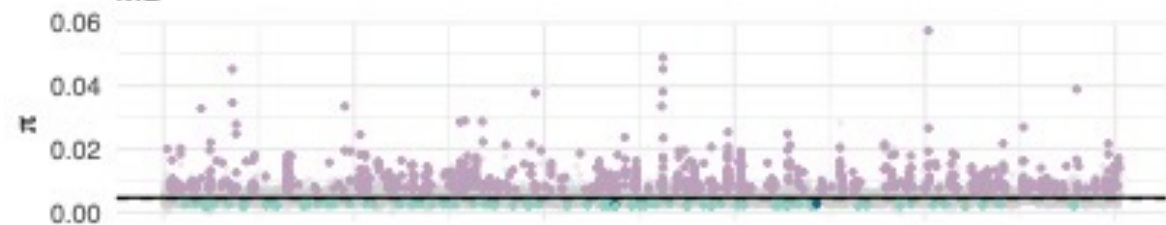

Scenarios: ● Allopatric selection ● Background selection ● Balancing selection

A

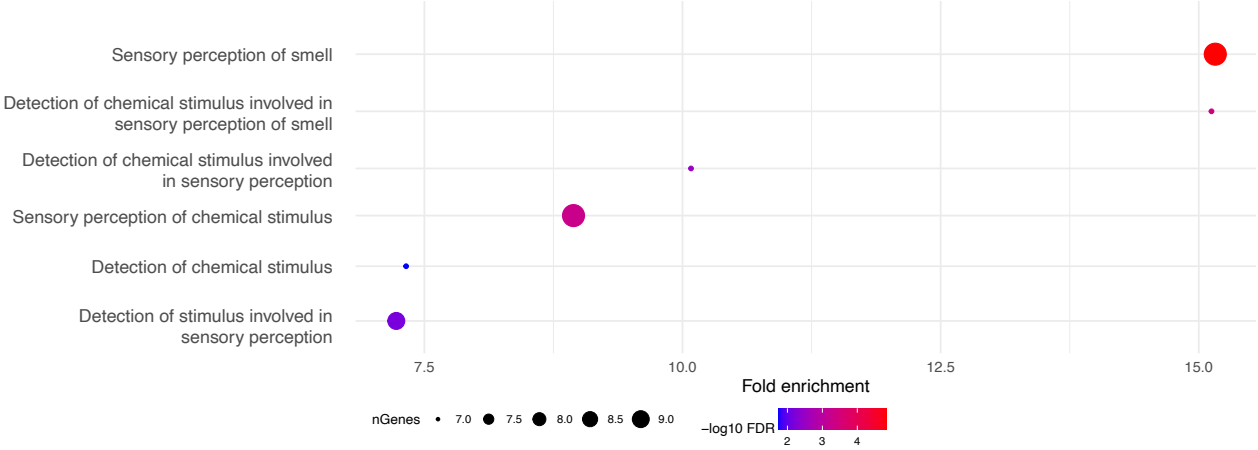

B

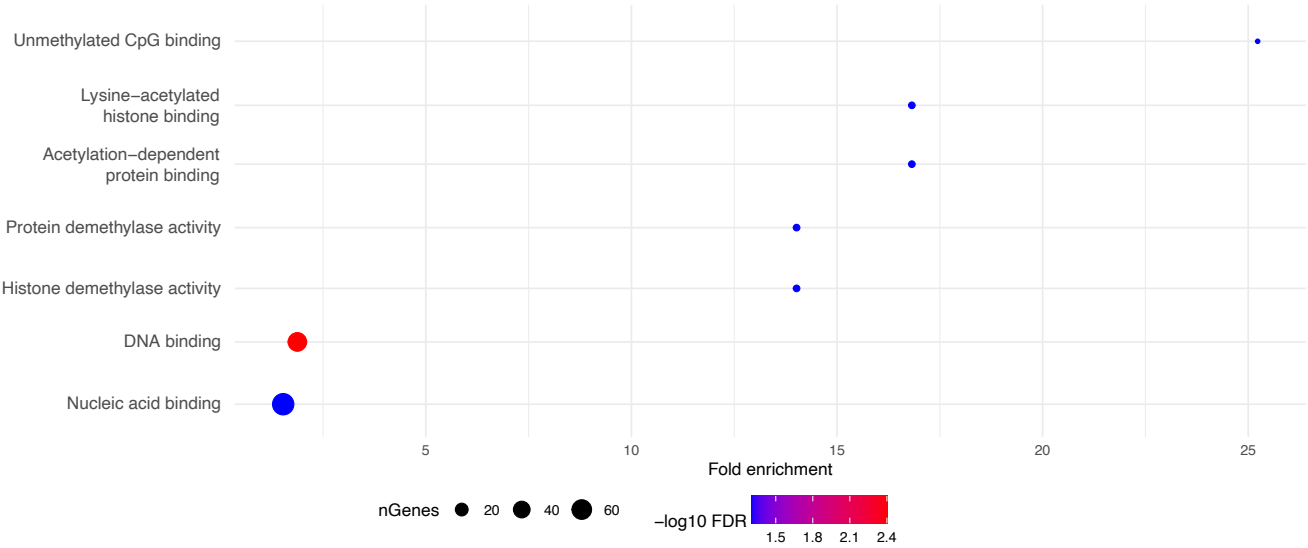

## Figure legends

Figure 1: Deer individuals in the study. (A) Sampling locations, colours represent the different groups: WTD allopatry (blue), WTD sympatry (violet), MD sympatry (green), MD allopatry (orange). Areas of sympatry are coloured in dark grey and areas of allopatry in light grey, from the IUCN range data for both species (IUCN, 2015a, 2015b). (B) Principal component analysis performed in PCAngsd. (C) Admixture proportions for  $K = 2$  calculated in NGSAdmix.

Figure 2: Introgression analyses. (A) ABBA-BABA analysis between individuals, we only show their assigned populations for clarity. Colour gradient represents Z score, excess of ABBA depicted as points, excess of BABA shown as triangles, arrows illustrate which populations are involved in gene flow. (B) Maximum likelihood tree inferred by Treemix for 0 migration (right) and the variance explained by each migration event (left).

Figure 3: Distribution of windows presenting pattern of selection across the genome for  $d_{xy}$  (top),  $F_{st}$  (middle) and  $\pi$  (bottom). Windows following a pattern of selection are coloured according to its corresponding evolutionary scenario, grey windows do not exhibit pattern of selection. The continuous and dashed line represent the mean and median respectively.

Figure 4: Gene enrichment analysis from outlier windows. (A) Biological process GOs enriched in the Balancing selection outlier windows. (B) Molecular function GOs enriched in the Background selection windows. Colour represents  $-\log_{10}$  FDR, size indicates the number of genes in our dataset that falls under given GO category.



## Tables

**Table 1:** Sample information

| Genome_ID | Species              | Location         | Sex     | Group         |
|-----------|----------------------|------------------|---------|---------------|
| Ov_ON3    | <i>O_virginianus</i> | Ontario          | Female  | WTD_allopatry |
| Ov_ON5    | <i>O_virginianus</i> | Ontario          | Male    | WTD_allopatry |
| Ov_ON6    | <i>O_virginianus</i> | Ontario          | Male    | WTD_allopatry |
| Ov_PA3    | <i>O_virginianus</i> | Pennsylvania     | Female  | WTD_allopatry |
| Ov_VA3    | <i>O_virginianus</i> | Virginia         | Female  | WTD_allopatry |
| Ov_AL3    | <i>O_virginianus</i> | Alabama          | Unknown | WTD_allopatry |
| Ov_SC1    | <i>O_virginianus</i> | South Carolina   | Female  | WTD_allopatry |
| Ov_AB1    | <i>O_virginianus</i> | Alberta          | Female  | WTD_sympatry  |
| Ov_SK2    | <i>O_virginianus</i> | Saskatchewan     | Male    | WTD_sympatry  |
| Ov_SK3    | <i>O_virginianus</i> | Saskatchewan     | Male    | WTD_sympatry  |
| Ov_SD1    | <i>O_virginianus</i> | South Dakota     | Male    | WTD_sympatry  |
| Ov_KS1    | <i>O_virginianus</i> | Kansas           | Female  | WTD_sympatry  |
| Ov_MT1    | <i>O_virginianus</i> | Montana          | Male    | WTD_sympatry  |
| Ov_MX2    | <i>O_virginianus</i> | Mexico           | Male    | WTD_sympatry  |
| Oh_NV2    | <i>O_hemionus</i>    | Nevada           | Male    | MD_allopatry  |
| Oh_CA3    | <i>O_hemionus</i>    | California       | Unknown | MD_allopatry  |
| Oh_BC6    | <i>O_hemionus</i>    | British Columbia | Male    | MD_allopatry  |
| Oh_BC8    | <i>O_hemionus</i>    | British Columbia | Male    | MD_allopatry  |
| Oh_BC1    | <i>O_hemionus</i>    | British Columbia | Female  | MD_allopatry  |
| Oh_AK1    | <i>O_hemionus</i>    | Alaska           | Unknown | MD_allopatry  |
| Oh_WA1    | <i>O_hemionus</i>    | Washington       | Male    | MD_allopatry  |
| Oh_AB1    | <i>O_hemionus</i>    | Alberta          | Female  | MD_sympatry   |
| Oh_UT2    | <i>O_hemionus</i>    | Utah             | Male    | MD_sympatry   |
| Oh_CO1    | <i>O_hemionus</i>    | Colorado         | Female  | MD_sympatry   |
| Oh_SK5    | <i>O_hemionus</i>    | Saskatchewan     | Unknown | MD_sympatry   |
| Oh_OR2    | <i>O_hemionus</i>    | Oregon           | Unknown | MD_sympatry   |
| Oh_SD2    | <i>O_hemionus</i>    | South Dakota     | Female  | MD_sympatry   |
| Oh_NM2    | <i>O_hemionus</i>    | New Mexico       | Male    | Oh_sympatry   |

**Table 2:** Different scenario and their thresholds for  $F_{st}$ ,  $\pi$  and  $D_{xy}$  percentiles

| Scenario                            | $F_{st}$ | $\pi$  | $D_{xy}$               | Panel in Fig.1A<br>Shang et al. (2021) |
|-------------------------------------|----------|--------|------------------------|----------------------------------------|
| Divergence with gene flow<br>(DwGF) | > 0.95   | < 0.05 | > 0.95                 | 1                                      |
| Allopatric selection (AS)           | > 0.95   | < 0.05 | Between 0.45 &<br>0.55 | 2                                      |
| Background selection (BGS)          | > 0.95   | < 0.05 | < 0.05                 | 3                                      |
| Balancing selection (BLS)           | < 0.05   | > 0.95 | > 0.95                 | 4                                      |
